# Supplementary material
Source: PubMed Central journal article supplement (PMC4432753)
Supplement: IAI.02965-14_zii999091228so1.pdf [file IAI.02965-14_zii999091228so1.pdf]

Supplementary Tables and Figures

Table S1. Primer list.

| Gene name        | Sequence                   | Size (bp) |
|------------------|----------------------------|-----------|
| IL-1 $\beta$ -5  | AAACAGATGAAGTGCTCCTTCCAGG  | 391       |
| IL-1 $\beta$ -3  | TGGAGAACACCACTTGTTGCTCCA   |           |
| IL-6-5           | ATGAACTCCTTCTCCACAAGCGC    | 628       |
| IL-6-3           | GAAGAGCCCTCAGGCTGGACTG     |           |
| IL-8-5           | ATGACTTCCAAGCTGGCCGTGGCT   | 289       |
| IL-8-3           | TCTCAGCCCTCTTCAAAAATTCTC   |           |
| IL-23p17-5       | AAA GGA TCC ACC AGG GTC    | 320       |
| IL-23P17-3       | TGC CAT CCT TGA GCT GCT    |           |
| CXCL1-5          | ATCACCCCAAGAACATCCA        | 183       |
| CXCL1-3          | CACCAGTGAGCTTCCTCCTC       |           |
| CXCL10/IP-10-5   | TGCAAGCCAATTTTGTCCACGTGTTG | 302       |
| CXCL10/IP-10-3   | GCAGCTGATTTGGTGACCATCATTGG |           |
| MMP2-5           | AGATCTTCTTCTTCAAGGACCG     | 224       |
| MMP2-3           | CTGGTCAGTGGCTTGGGGTA       |           |
| MMP9-5           | GACGCAGACATCGTCATC         | 119       |
| MMP9-3           | AACTCGTCATCGTCGAAATGG      |           |
| $\beta$ -actin-5 | ACTCTTCCAGCCTTCCTTCC       | 516       |
| $\beta$ -actin-3 | TGTCACCTTCACCGTTCCAG       |           |

Table S2. Alignment of 80 Cytokines on the human Cytokine Antibody Array

| Positive control | Positive control | Positive control | Positive control | Negative control | Negative control | ENA-78         | GCSF           | GM-CSF         | GRO              | GRO- $\alpha$    |
|------------------|------------------|------------------|------------------|------------------|------------------|----------------|----------------|----------------|------------------|------------------|
| I-309            | IL-1 $\alpha$    | IL-1 $\beta$     | IL-2             | IL-3             | IL-4             | IL-5           | IL-6           | IL-7           | IL-8             | IL-10            |
| IL-12 p40/p70    | IL-13            | IL-15            | IFN- $\gamma$    | MCP-1            | MCP-2            | MCP-3          | MCSF           | MDC            | MIG              | MIP-1 $\beta$    |
| MIP-1 $\delta$   | RANTES           | SCF              | SDF-1            | TARC             | TGF- $\beta$ 1   | TNF- $\alpha$  | TNF- $\beta$   | EGF            | IGF-I            | Angiogenin       |
| Oncostatin M     | Thrombopoitin    | VEGF             | PDGF-BB          | Leptin           | BDNF             | BLC            | Ck $\beta$ S-1 | Eotaxin        | Eotaxin-2        | Eotaxin-3        |
| FGF-4            | FGF-6            | FGF-7            | FGF-9            | Flt-3 Ligand     | Fractalkine      | GCP-2          | GDNF           | HGF            | IGFBP-1          | IGFBP-2          |
| IGFBP-3          | IGFBP-4          | IL-16            | IP-10            | LIF              | LIGHT            | MCP-4          | MIF            | MIP-3 $\alpha$ | NAP-2            | NT-3             |
| NT-4             | Osteopontin      | Osteoprotegrin   | PARC             | PIGF             | TGF- $\beta$ 2   | TGF- $\beta$ 3 | TIMP-1         | TIMP-2         | Positive control | Positive control |

Note: GRO detects CXCL1, CXCL2, CXCL3; GRO- $\alpha$  detects only CXCL1; IL-12 p40p70 detects both IL-12 p40 and IL-12 p70; TGF- $\beta$ 1 detects only active form; VEGF detects VEGF-165 and VEGF-121.

Table S3. Real-Time PCR Primer list.

| Gene name | Sequence                | size (bp) |
|-----------|-------------------------|-----------|
| IL-6-5    | AGGGCTCTTCGGCAAATGTA    | 61        |
| IL-6-3    | GAAGGAATGCCCATTAACAACAA |           |
| CXCL1-5   | TGCGAGTGGCACTGCTGCTC    | 157       |
| CXCL1-3   | TGGGGTCCGGGGGACTTCAC    |           |
| IL-17-5   | GGAACGTGGACTACCACATGAA  | 58        |
| IL-17-3   | GCGCAGGACCAGGATCTCT     |           |
| IL-21-5   | GGAAAGGATTGTCATCTGTCTG  | 155       |
| IL-21-3   | GCTGGCAGAAATTCAGGGAC    |           |
| IL-23-5   | TTCTGCTTGCAAAGGATCCA    | 58        |
| IL-23-3   | TCCGATCCTAGCAGCTTCTCA   |           |

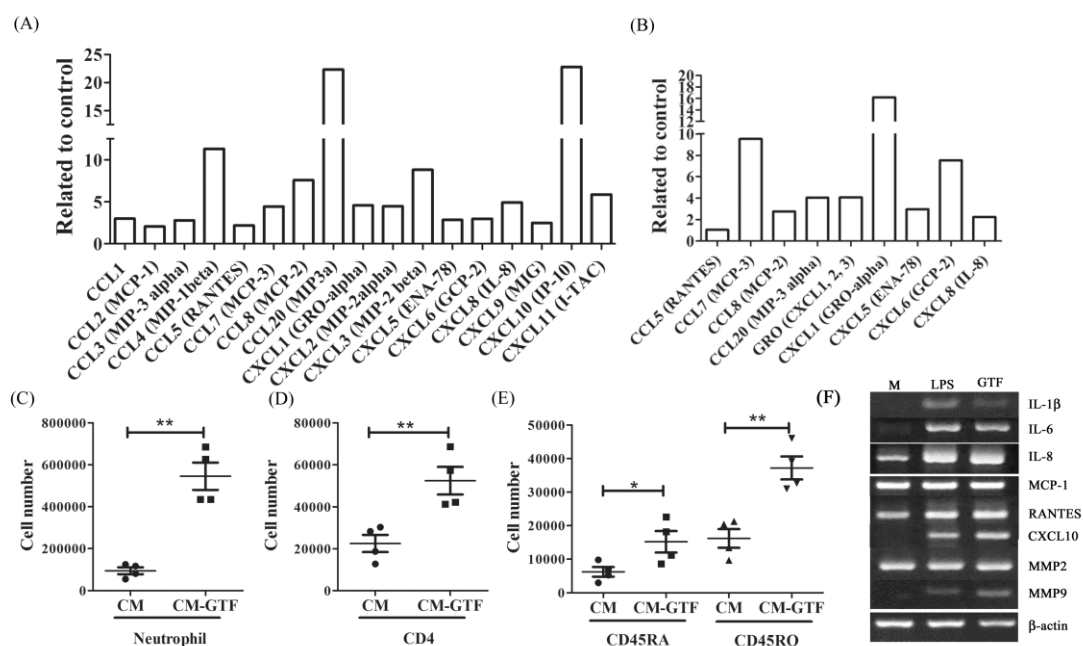

Figure S1. Chemokines and leukocyte migration profiles in valvular interstitial cells (VICs). The expression of chemokine genes in GTF-activated VICs was determined by chemokine PCR array (A), or chemokine protein array (B), the data represented as the related fold compared to unstimulated VICs. Migration of leukocyte by cultured medium (CM) or conditioned medium-GTF (CM-GTF) was measured using a two-chamber migration assay. The number of transmigrated Neutrophils (C), CD4<sup>+</sup> T cells (D), CD45RA<sup>+</sup> or CD45RO<sup>+</sup> T cells (E) was stained with respective surface markers and analyzed by FACS. The expression of *IL-1β*, *IL-6*, *IL-8*, *MCP-1*, *RANTES*, *CXCL10*, *MMP2*, *MMP9*, and *actin* were determined by RT-PCR (F). The experiments were performed independently from four individuals and indicated as the means of migrated cells ± SEM. Significant differences among groups, as determined by student *t*-tests, are indicated by asterisks (\*\**p* < 0.01).
